# Supplementary material for: Spare Parts Inventory Management with Substitution-Dependent Reliability
Source: Atypon-hosted journal article supplement (doi:10.1287/ijoc.2017.0794), 2018-08-01
Supplement: ijoc.2017.0794-sm.pdf [file ijoc.2017.0794-sm.pdf]

# Online Supplement for “Spare Parts Inventory Management with Substitution-Dependent Reliability”

Amin Khademi, Burak Eksioglu

Department of Industrial Engineering, Clemson University

## 1 Proofs

**Proof of Proposition 1:** Substituting formulations (1) and (3) into formulation (5) results in

$$\begin{aligned}
 v^{\pi^n}(s) &= \min_{(o,a) \in A(s)} \left\{ \sum_{i \in \mathcal{I}} c_i^o o_i + \sum_{i \in \mathcal{I}} c_i^h (x_i - \sum_{m \in \mathcal{M}} a_i^m) + \sum_{m \in \bar{Y}} c^m (1 - \sum_{i \in \mathcal{I}} a_i^m) + \right. \\
 &\left. \lambda \mathbb{E} \left( \alpha_0 + \sum_{i \in \mathcal{I}} \alpha_i |x'_i - w_i \sum_{m \in \bar{F}(i)} \mathbf{1}_{\{y'_m=0\}}| + \sum_{m \in \mathcal{M}} \beta_m \mathbf{1}_{\{y'_m=0\}} + \sum_{m \in \mathcal{M}} \zeta_m \sum_{i \in F(m)} p_i^m \mathbf{1}_{\{y'_m=i\}} \mid s \right) \right\} \\
 &= f_1(s, \alpha) + \min_{(o,a) \in A(s)} \left\{ \sum_{i \in \mathcal{I}} c_i^o o_i - \sum_{i \in \mathcal{I}} \sum_{m \in \mathcal{M}} c_i^h a_i^m - \sum_{i \in \mathcal{I}} \sum_{m \in \bar{Y}} c^m a_i^m + \sum_{i \in \mathcal{I}} \lambda \alpha_i \mathbb{E}(|x'_i - w_i \sum_{m \in \bar{F}(i)} \mathbf{1}_{\{y'_m=0\}}| \mid s) + \right. \\
 &\left. \sum_{m \in \mathcal{M}} \lambda \beta_m \mathbb{E}(\mathbf{1}_{\{y'_m=0\}} \mid s) + \sum_{m \in \mathcal{M}} \lambda \zeta_m \sum_{i \in F(m)} p_i^m \mathbb{E}(\mathbf{1}_{\{y'_m=i\}} \mid s) \right\} \\
 &= f_1(s, \alpha) + \min_{(o,a) \in A(s)} \left\{ \sum_{i \in \mathcal{I}} c_i^o o_i - \sum_{i \in \mathcal{I}} \sum_{m \in \mathcal{M}} c_i^h a_i^m - \sum_{i \in \mathcal{I}} \sum_{m \in \bar{Y}} c^m a_i^m + \sum_{i \in \mathcal{I}} \lambda \alpha_i \mathbb{E}(|x'_i - w_i \sum_{m \in \bar{F}(i)} \mathbf{1}_{\{y'_m=0\}}| \mid s) + \right. \\
 &\left. \sum_{m \in \mathcal{M}} \lambda \beta_m P(y'_m = 0 \mid s) + \sum_{m \in \mathcal{M}} \lambda \zeta_m \sum_{i \in F(m)} p_i^m P(y'_m = i \mid s) \right\}
 \end{aligned}$$

where  $f_1(s, \alpha)$  is a term independent of action, and  $s'$  denotes the state in the next period. Note that expectations are conditioned on the current state  $s$ . Since calculating the expectation  $\mathbb{E}(|x'_i - w_i \sum_{m \in \bar{F}(i)} \mathbf{1}_{\{y'_m=0\}}|)$  is intractable in closed form, we settle for relaxing  $v^{\pi^n}(s)$ . Because the absolute value function  $|\cdot|$  is convex, by Jensen's inequality

$$\mathbb{E}(|x'_i - w_i \sum_{m \in \bar{F}(i)} \mathbf{1}_{\{y'_m=0\}}|) \geq |\mathbb{E}(x'_i - w_i \sum_{m \in \bar{F}(i)} \mathbf{1}_{\{y'_m=0\}})|.$$

Moreover,

$$\begin{aligned}
 P(y'_m = 0 \mid s) &= (1 - \sum_{i \in \mathcal{I}} a_i^m) + \sum_{i \in \mathcal{I}} a_i^m p_i^m, \quad \forall m \in \bar{Y}, \\
 P(y'_m = 0 \mid s) &= p_{y_m}^m, \quad \forall m \in \mathcal{M} \setminus \bar{Y}, \\
 P(y'_m = i \mid s) &= (1 - p_i^m) \mathbf{1}_{\{y_m=i\}} + (1 - p_i^m) a_i^m, \quad \forall m \in \mathcal{M}, i \in F(m),
 \end{aligned}$$

and

$$\begin{aligned}
 \mathbb{E}(x'_i - w_i \sum_{m \in \bar{F}(i)} \mathbf{1}_{\{y'_m=0\}} \mid s) &= x_i + o_i - \sum_{m \in \bar{F}(i)} a_i^m - w_i \sum_{m \in \bar{F}(i)} P(y'_m = 0 \mid s) \\
 &= x_i + o_i - \sum_{m \in \bar{F}(i)} a_i^m - w_i \sum_{m \in \bar{F}(i) \cap \bar{Y}} ((1 - \sum_{j \in \mathcal{I}} a_j^m) + \sum_{j \in \mathcal{I}} a_j^m p_j^m) - w_i \sum_{m \in \bar{F}(i) \setminus \bar{Y}} p_{y_m}^m.
 \end{aligned}$$

Therefore, by rearranging terms and considering  $A(s)$  one can construct the following mathematical program

$$\begin{aligned}
v^R(s) &= f(s, \alpha, \beta, \zeta) + \min \sum_{i \in \mathcal{I}} c_i^o o_i - \sum_{i \in \mathcal{I}} \sum_{m \in \bar{Y}} (c_i^h + c^m + \lambda \beta_m (1 - p_i^m)) a_i^m + \sum_{i \in \mathcal{I}} \sum_{m \in \mathcal{M} \setminus \bar{Y}} c_i^h a_i^m + \\
&\sum_{i \in \mathcal{I}} \sum_{m \in \mathcal{M}} (\lambda \zeta_m p_i^m (1 - p_i^m)) a_i^m + \sum_{i \in \mathcal{I}} \lambda \alpha_i |\mathbb{E}(x'_i - w_i \sum_{m \in \bar{F}(i)} \mathbf{1}_{\{y'_m=0\}})| \\
\text{s.t.} & \\
&\sum_{m \in \bar{F}(i) \cap \bar{Y}} a_i^m \leq x_i, \quad \forall i, \\
&\sum_{i \in F(m)} a_i^m \leq 1, \quad \forall m \in \bar{Y}, \\
&a_i^m = 0, \quad \forall i, m \in \mathcal{M} \setminus \bar{Y}, \\
&o_i \geq 0, \quad o_i \in \mathbb{Z}_+, \quad a_i^m \in \{0, 1\} \quad \forall i, m.
\end{aligned}$$

Let  $z_i = |\mathbb{E}(x'_i - w_i \sum_{m \in \bar{F}(i)} \mathbf{1}_{\{y'_m=0\}})|$ . Since  $\alpha \geq 0$ , the above nonlinear program is equivalent to the following mixed integer linear program

$$\begin{aligned}
v^R(s) &= f(s, \alpha, \beta, \zeta) + \min \sum_{i \in \mathcal{I}} (c_i^o o_i + \lambda \alpha_i z_i) - \sum_{i \in \mathcal{I}} \sum_{m \in \bar{Y}} (c_i^h + c^m + \lambda \beta_m (1 - p_i^m) - \lambda \zeta_m p_i^m (1 - p_i^m)) a_i^m \\
\text{s.t.} & \\
&\sum_{m \in \bar{F}(i) \cap \bar{Y}} a_i^m \leq x_i, \quad \forall i, \\
&\sum_{i \in F(m)} a_i^m \leq 1, \quad \forall m \in \bar{Y}, \\
&z_i \geq x_i + o_i - \sum_{m \in \bar{F}(i)} a_i^m - w_i \sum_{m \in \bar{F}(i) \cap \bar{Y}} \left( (1 - \sum_{j \in \mathcal{I}} a_j^m) + \sum_{j \in \mathcal{I}} a_j^m p_j^m \right) - w_i \sum_{m \in \bar{F}(i) \setminus \bar{Y}} p_{y_m}^m, \quad \forall i, \\
&-z_i \leq x_i + o_i - \sum_{m \in \bar{F}(i)} a_i^m - w_i \sum_{m \in \bar{F}(i) \cap \bar{Y}} \left( (1 - \sum_{j \in \mathcal{I}} a_j^m) + \sum_{j \in \mathcal{I}} a_j^m p_j^m \right) - w_i \sum_{m \in \bar{F}(i) \setminus \bar{Y}} p_{y_m}^m, \quad \forall i, \\
&a_i^m = 0, \quad \forall i, m \in \mathcal{M} \setminus \bar{Y}, \\
&o_i, z_i \geq 0, \quad o_i \in \mathbb{Z}_+, \quad a_i^m \in \{0, 1\} \quad \forall i, m.
\end{aligned}$$

Rearranging the terms constructs formulation (6).

**Proof of Proposition 2:** Let  $n_i = |\bar{F}(i)|$ . For each  $i$  we have

$$\hat{p}_i^{OP} = \min_{m \in \bar{F}(i)} p_{y_m}^m \leq \hat{p}_i^{EX} = \frac{\sum_{m \in \bar{F}(i)} p_{y_m}^m}{n_i} \leq \hat{p}_i^{RO} = \max_{m \in \bar{F}(i)} p_{y_m}^m. \quad (3)$$

Let  $\mathcal{X}^{OP} \sim \text{binomial}(n_i, \hat{p}_i^{OP})$ ,  $\mathcal{X}^{EX} \sim \text{binomial}(n_i, \hat{p}_i^{EX})$ , and  $\mathcal{X}^{RO} \sim \text{binomial}(n_i, \hat{p}_i^{RO})$ . Formulation (3) leads to

$$\mathcal{X}^{OP} \leq_{st} \mathcal{X}^{EX} \leq_{st} \mathcal{X}^{RO}, \quad (4)$$

where  $\leq_{st}$  denotes stochastic ordering. We know that  $G_i(\cdot) = \frac{\hat{c}_i - c_i^o}{\hat{c}_i + c_i^h}$  is increasing in  $\hat{c}_i$  for  $\hat{c}_i > 0$  and

$$0 < \hat{c}_i^{OP} = \min_{m \in \bar{F}(i)} c^m \leq \hat{c}_i^{EX} = \frac{\sum_{m \in \bar{F}(i)} c^m}{n_i} \leq \hat{c}_i^{RO} = \max_{m \in \bar{F}(i)} c^m.$$

Therefore,

$$G_i(x_i^H - y_i^H + o_i^{OP}) \leq G_i(x_i^H - y_i^H + o_i^{EX}) \leq G_i(x_i^H - y_i^H + o_i^{RO}). \quad (5)$$

Finally, formulations (4) and (5) result in

$$o_i^{OP} \leq o_i^{EX} \leq o_i^{RO}.$$

## 2 Sampling States

As noted by de Farias and Roy (2004),  $\varphi$  regulates the quality of the approximation across  $S$ , and can therefore be used to target certain regions of the state space where one aims to obtain better approximations. In that regard, we would like to obtain better approximations in the states that are most likely to be visited in the near future when the “optimal” policy is used. For a policy  $\pi$ , define the distribution  $\varphi_\pi$  by

$$\varphi_\pi(s) := (1 - \lambda) \sum_{t=0}^{\infty} \lambda^t \mathbb{P}_\pi\{s^t = s | s^0\}, \quad s \in S.$$

We would like to use  $\varphi_{\pi^*}$  in the objective function of formulation (7), and also in sampling  $\hat{S}$  through  $\psi$ , as prescribed in de Farias and Roy (2004, Theorem 3.1., p.469). Unfortunately, one does not have prior access to  $\pi^*$ . Let  $\pi^0$  denote an initial policy. Finding  $\varphi_{\pi^0}$  is computationally intractable, thus, we settle for approximating it using its empirical counterpart,  $\hat{\varphi}_{\pi^0, T'}$ , where

$$\hat{\varphi}_{\pi, T'}(S) := (1 - \lambda) \sum_{t=0}^{T'} \lambda^t \mathbf{1}_{\{s^t(\omega) = s\}}, \quad s \in S, \pi \in \mathcal{P},$$

where  $\{s^t(\omega) : t \geq 0\}$  represents the outcome of a Monte Carlo simulation and  $T'$  denotes the simulation budget. (In our numerical study we take the average over many replications.) We use this simulation run to select  $\hat{S}$  as well: Computing  $\psi$  is infeasible, thus we approximate it as  $\hat{\varphi}_{\pi, T'}$ . The underlying motivation is that if on most simulation runs, states are visited at most once, thus we approximate  $\mathbb{P}_\pi\{s^t = s | s^0 = s'\} \approx \sum_{r=1}^R \mathbf{1}_{\{s^t(\omega_r) = s\}} / R$ , where  $R$  is the number of replications. This results in  $\varphi \approx \psi$ .

## References

de Farias, D. P. and Roy, B. V. (2004), ‘On constraint sampling in the linear programming approach to approximate dynamic programming’, *Mathematics of Operations Research* **29**(3), 462–478.
